# Supplementary material for: Genome-wide identification of LcC2DPs gene family in Lotus corniculatus provides insights into regulatory network in response to abiotic stresses
Source: Research Square preprint supplement (doi:10.21203/rs.3.rs-5763738/v1), 2025-01-13
Supplement: Supplementary file 1 [file e6398d60e16816788f50b06c.docx]

Supplementary Tables

Table S1. Physicochemical properties of *LcC2DPs* family members.

Table. S2. Gene-specific primers for quantitative real-time PCR analysis.

Table. S3. *LcC2DP5* and *LcC2DP15* genes co-expressed transcription factor number statistics.

**Table S1. Physicochemical properties of *LcC2DPs* family members.**

| **Gene name** | **Gene ID** | **intron** | **Subcellular localization** | **Protein length** | **Molecular weight** | **Theoretical pI** | **Aliphatic index** | **Hydrophilicity** | **Instability index** |
| --- | --- | --- | --- | --- | --- | --- | --- | --- | --- |
| *LcC2DP1* | Lj1g3v0026680.1 | 3 | chlo | 118 | 13373.07 | 6.07 | 75.00 | -0.452 | 41.43 |
| *LcC2DP2* | Lj0g3v0012259.1 | 9 | nucleus | 197 | 22229.20 | 6.23 | 76.70 | -0.393 | 59.55 |
| *LcC2DP3* | Lj0g3v0004479.1 | 0 | nucleus | 1056 | 118888.05 | 6.28 | 74.56 | -0.485 | 43.31 |
| *LcC2DP4* | Lj0g3v0078179.1 | 4 | nucleus | 420 | 45711.91 | 4.68 | 72.36 | -0.401 | 54.28 |
| *LcC2DP5* | Lj0g3v0075379.1 | 15 | cyto | 467 | 53229.21 | 7.66 | 94.48 | -0.240 | 34.24 |
| *LcC2DP6* | Lj0g3v0097079.1 | 0 | nucleus | 119 | 13250.65 | 4.61 | 64.71 | -0.545 | 42.06 |
| *LcC2DP7* | Lj0g3v0101819.1 | 0 | nucleus | 863 | 97660.72 | 6.35 | 80.12 | -0.413 | 34.90 |
| *LcC2DP8* | Lj0g3v0100539.1 | 9 | nucleus | 197 | 22239.24 | 6.12 | 77.21 | -0.352 | 55.37 |
| *LcC2DP9* | Lj0g3v0105589.1 | 11 | Plas | 336 | 789062.1 | 6.38 | 111.58 | 0.194 | 23.48 |
| *LcC2DP10* | Lj0g3v0213289.1 | 0 | chlo | 219 | 24218.72 | 9.79 | 91.10 | -0.102 | 47.59 |
| *LcC2DP11* | Lj0g3v0123229.1 | 0 | chlo | 102 | 11498.91 | 4.66 | 76.47 | -0.316 | 33.52 |
| *LcC2DP12* | Lj0g3v0125309.1 | 4 | nucleus | 475 | 53461.45 | 8.78 | 72.74 | -0.536 | 42.26 |
| *LcC2DP13* | Lj0g3v0130579.1 | 8 | nucleus | 600 | 67971.06 | 6.62 | 70.18 | -0.545 | 38.75 |
| *LcC2DP14* | Lj0g3v0145769.1 | 5 | chlo | 567 | 63770.71 | 5.84 | 102.56 | -0.070 | 31.30 |
| *LcC2DP15* | Lj0g3v0131489.1 | 9 | chlo | 148 | 16328.85 | 4.12 | 75.81 | -0.456 | 42.32 |
| *LcC2DP16* | Lj0g3v0175299.1 | 6 | cyto | 71 | 8160.47 | 8.68 | 94.51 | -0.061 | 17.73 |
| *LcC2DP17* | Lj0g3v0189439.1 | 0 | cyto | 195 | 22687.32 | 9.30 | 71.90 | -0.483 | 34.72 |
| *LcC2DP18* | Lj0g3v0192599.1 | 0 | cyto | 126 | 14662.12 | 9.30 | 95.79 | -0.246 | 19.20 |
| *LcC2DP19* | Lj0g3v0192609.1 | 1 | cyto | 108 | 12565.50 | 9.16 | 90.09 | -0.381 | 16.79 |
| *LcC2DP20* | Lj0g3v0196479.1 | 1 | cysk | 307 | 33902.37 | 6.67 | 87.33 | -0.418 | 57.19 |
| *LcC2DP21* | Lj0g3v0200359.1 | 0 | chlo | 305 | 33124.96 | 7.78 | 66.23 | -0.626 | 42.79 |
| *LcC2DP22* | Lj0g3v0344659.1 | 0 | chlo | 171 | 19047.78 | 5.05 | 93.98 | -0.168 | 36.85 |
| *LcC2DP23* | Lj0g3v0216959.1 | 1 | Plas | 1032 | 117323.15 | 6.29 | 89.64 | -0.276 | 47.47 |
| *LcC2DP24* | Lj0g3v0214479.1 | 3 | chlo | 60 | 6681.80 | 9.12 | 70.00 | -0.402 | 67.14 |
| *LcC2DP25* | Lj0g3v0250309.1 | 9 | nucleus | 445 | 49401.64 | 4.90 | 65.24 | -0.633 | 47.62 |
| *LcC2DP26* | Lj0g3v0255459.1 | 4 | nucl | 1056 | 118888.05 | 6.28 | 74.56 | -0.485 | 43.31 |
| *LcC2DP27* | Lj0g3v0266549.1 | 11 | E.R | 528 | 60121.42 | 8.70 | 100.70 | -0.130 | 32.36 |
| *LcC2DP28* | Lj0g3v0288789.1 | 11 | E.R | 529 | 60234.58 | 8.70 | 101.25 | -0.121 | 32.32 |
| *LcC2DP29* | Lj0g3v0289109.1 | 6 | nucl | 527 | 59941.34 | 9.37 | 90.93 | -0.375 | 33.12 |
| *LcC2DP30* | Lj0g3v0297259.1 | 6 | plas | 775 | 88980.92 | 9.27 | 90.03 | -0.291 | 44.76 |
| *LcC2DP31* | Lj0g3v0335339.1 | 0 | plas | 798 | 91531.42 | 9.29 | 82.66 | -0.362 | 44.10 |
| *LcC2DP32* | Lj0g3v0316049.1 | 2 | nucleus | 154 | 17396.57 | 5.96 | 66.43 | -0.466 | 53.36 |
| *LcC2DP33* | Lj0g3v0335969.1 | 3 | nucl | 650 | 71602.95 | 7.24 | 64.03 | -0.559 | 60.02 |
| *LcC2DP34* | Lj0g3v0340149.1 | 8 | chlo | 150 | 16513.97 | 4.86 | 90.47 | 0.243 | 30.17 |
| *LcC2DP35* | Lj0g3v0342079.1 | 0 | nucleus | 220 | 24443.95 | 9.97 | 70.45 | -0.506 | 51.73 |
| *LcC2DP36* | Lj1g3v2609230.1 | 3 | nucleus | 186 | 20485.03 | 9.36 | 83.17 | -0.322 | 36.66 |
| **Gene name** | **Gene ID** | **intron** | **Subcellular localization** | **Protein length** | **Molecular weight** | **Theoretical pI** | **Aliphatic index** | **Hydrophilicity** | **Instability index** |
| *LcC2DP37* | Lj1g3v1112820.2 | 0 | plas | 316 | 34891.02 | 4.96 | 79.91 | -0.411 | 50.18 |
| *LcC2DP38* | Lj1g3v3342730.1 | 0 | cyto | 191 | 21870.99 | 5.53 | 108.74 | -0.163 | 33.13 |
| *LcC2DP39* | Lj1g3v1858460.1 | 0 | cyto | 305 | 34873.89 | 6.35 | 78.59 | -0.534 | 43.59 |
| *LcC2DP40* | Lj1g3v1911660.1 | 4 | nucleus | 826 | 94242.88 | 6.65 | 80.01 | -0.431 | 36.31 |
| *LcC2DP41* | Lj1g3v1911690.1 | 3 | mito | 834 | 94989.22 | 6.13 | 82.51 | -0.393 | 43.73 |
| *LcC2DP42* | Lj1g3v2264770.1 | 3 | chlo | 300 | 33749.72 | 6.53 | 88.33 | -0.206 | 42.68 |
| *LcC2DP43* | Lj2g3v0674840.1 | 0 | cyto | 174 | 19885.97 | 5.96 | 100.11 | -0.302 | 44.09 |
| *LcC2DP44* | Lj2g3v1659550.1 | 0 | nucleus | 863 | 97730.79 | 6.37 | 79.44 | -0.422 | 34.72 |
| *LcC2DP45* | Lj1g3v2629780.1 | 0 | nucleus | 678 | 35782.9 | 7.61 | 76.28 | -0.483 | 39.43 |
| *LcC2DP46* | Lj1g3v3342740.1 | 8 | cyto | 262 | 30034.17 | 5.97 | 81.79 | -0.811 | 40.60 |
| *LcC2DP47* | Lj1g3v3933490.1 | 3 | cyto | 256 | 28784.60 | 5.31 | 70.39 | -0.502 | 55.04 |
| *LcC2DP48* | Lj1g3v4955270.1 | 9 | nucleus | 595 | 64954.89 | 5.63 | 87.39 | -0.068 | 35.43 |
| *LcC2DP49* | Lj2g3v0319380.1 | 3 | chlo | 304 | 32352.59 | 4.79 | 60.13 | -0.657 | 33.92 |
| *LcC2DP50* | Lj2g3v0725300.1 | 0 | chlo | 814 | 92020.54 | 6.39 | 94.89 | -0.280 | 46.05 |
| *LcC2DP51* | Lj2g3v1647880.1 | 1 | nucl | 863 | 97730.79 | 6.37 | 79.44 | -0.422 | 34.72 |
| *LcC2DP52* | Lj2g3v2003100.1 | 0 | cyto | 763 | 85676.59 | 8.21 | 80.46 | -0.374 | 32.20 |
| *LcC2DP53* | Lj2g3v2017630.1 | 2 | plas | 1002 | 114523.38 | 9.10 | 87.50 | -0.286 | 37.79 |
| *LcC2DP54* | Lj2g3v2183200.1 | 3 | nucleus | 317 | 34174.51 | 8.38 | 62.49 | -0.415 | 47.22 |
| *LcC2DP55* | Lj2g3v2256390.1 | 8 | mito | 588 | 67251.13 | 5.54 | 76.72 | -0.555 | 39.37 |
| *LcC2DP56* | Lj2g3v2256400.1 | 0 | mito | 579 | 66768.03 | 6.84 | 74.56 | -0.496 | 42.10 |
| *LcC2DP57* | Lj2g3v2586630.1 | 5 | cyto | 153 | 17419.64 | 5.17 | 74.51 | -0.559 | 31.20 |
| *LcC2DP58* | Lj4g3v2917620.1 | 7 | nucleus | 143 | 15859.66 | 4.52 | 72.94 | -0.426 | 38.13 |
| *LcC2DP59* | Lj2g3v3336160.1 | 10 | cyto | 182 | 20500.12 | 5.52 | 71.70 | -0.529 | 34.73 |
| *LcC2DP60* | Lj6g3v0098540.2 | 0 | chlo | 870 | 97533.88 | 5.15 | 76.89 | -0.453 | 47.11 |
| *LcC2DP61* | Lj6g3v0433950.1 | 0 | cyto | 165 | 18809.83 | 6.43 | 113.15 | -0.151 | 36.58 |
| *LcC2DP62* | Lj6g3v0802320.1 | 0 | nucleus | 417 | 45313.41 | 4.69 | 71.94 | -0.432 | 60.07 |
| *LcC2DP63* | Lj3g3v1036640.1 | 10 | cyto | 551 | 60710.26 | 5.17 | 70.69 | -0.779 | 53.86 |
| *LcC2DP64* | Lj3g3v2720280.1 | 4 | cyto | 294 | 31059.71 | 5.90 | 101.43 | -0.049 | 19.19 |
| *LcC2DP65* | Lj1g3v1858450.1 | 9 | plas | 512 | 55241.52 | 6.52 | 108.93 | 0.129 | 23.65 |
| *LcC2DP66* | Lj3g3v3271560.1 | 1 | plas | 770 | 88556.55 | 9.16 | 92.22 | -0.204 | 45.37 |
| *LcC2DP67* | Lj3g3v3511370.1 | 0 | vacu | 395 | 42756.36 | 4.79 | 107.27 | 0.110 | 31.05 |
| *LcC2DP68* | Lj3g3v3755410.1 | 0 | plas | 1019 | 117044.27 | 8.81 | 82.89 | -0.456 | 51.64 |
| *LcC2DP69* | Lj4g3v0511330.1 | 0 | chlo | 503 | 56545.03 | 7.31 | 71.49 | -0.440 | 43.67 |
| *LcC2DP70* | Lj4g3v0643970.1 | 1 | nucleus | 170 | 19341.25 | 5.04 | 96.71 | -0.312 | 32.98 |
| *LcC2DP71* | Lj4g3v1333410.1 | 8 | cyto | 199 | 22592.77 | 5.64 | 92.01 | -0.272 | 33.46 |
| *LcC2DP72* | Lj4g3v1333420.1 | 2 | plas | 393 | 45764.54 | 9.73 | 98.63 | -0.072 | 53.65 |
| *LcC2DP73* | Lj4g3v1614760.1 | 7 | plas | 1021 | 116398.45 | 8.30 | 84.11 | -0.376 | 51.16 |
| *LcC2DP74* | Lj4g3v1894270.1 | 4 | cyto | 174 | 19565.28 | 5.14 | 97.41 | -0.327 | 25.02 |
| *LcC2DP75* | Lj4g3v1895880.1 | 2 | cyto | 257 | 29544.80 | 5.17 | 94.71 | -0.247 | 37.84 |
| *LcC2DP76* | Lj4g3v1896260.1 | 0 | nucl | 527 | 59927.31 | 9.37 | 90.93 | -0.375 | 33.12 |
| *LcC2DP77* | Lj4g3v1896540.1 | 3 | mito | 176 | 19373.01 | 5.96 | 98.58 | -0.256 | 27.81 |
| *LcC2DP78* | Lj4g3v1909900.1 | 8 | cyto | 503 | 57121.68 | 6.07 | 95.11 | -0.315 | 32.41 |
| **Gene name** | **Gene ID** | **intron** | **Subcellular localization** | **Protein length** | **Molecular weight** | **Theoretical pI** | **Aliphatic index** | **Hydrophilicity** | **Instability index** |
| *LcC2DP79* | Lj4g3v2871890.1 | 4 | chlo | 578 | 63773.56 | 5.42 | 93.08 | -0.100 | 33.88 |
| *LcC2DP80* | Lj2g3v2747660.1 | 8 | nucl | 374 | 43020.85 | 8.37 | 60.16 | -0.723 | 48.84 |
| *LcC2DP81* | Lj4g3v3114890.1 | 0 | cyto | 168 | 18872.83 | 5.24 | 105.42 | -0.146 | 47.46 |
| *LcC2DP82* | Lj3g3v0881640.1 | 0 | plas | 815 | 93909.99 | 9.25 | 84.94 | -0.327 | 47.55 |
| *LcC2DP83* | Lj6g3v0521670.1 | 8 | pero | 561 | 63857.50 | 5.35 | 77.97 | -0.405 | 41.00 |
| *LcC2DP84* | Lj3g3v0883670.1 | 14 | plas | 776 | 88403.12 | 8.96 | 86.52 | -0.406 | 44.52 |
| *LcC2DP85* | Lj6g3v0960490.1 | 8 | nucleus | 445 | 49414.73 | 4.98 | 66.34 | -0.616 | 47.96 |
| *LcC2DP86* | Lj6g3v1371830.1 | 9 | cyto | 115 | 13136.20 | 6.27 | 93.22 | -0.171 | 22.05 |
| *LcC2DP87* | Lj6g3v1444480.1 | 9 | nucleus | 213 | 22779.60 | 8.89 | 64.51 | -0.514 | 41.52 |
| *LcC2DP88* | Lj6g3v1643230.1 | 1 | nucleus | 168 | 18632.12 | 5.94 | 81.19 | -0.356 | 25.38 |
| *LcC2DP89* | Lj6g3v1708400.1 | 8 | plas | 669 | 75322.45 | 6.40 | 89.45 | -0.184 | 47.46 |
| *LcC2DP90* | Lj5g3v0239180.1 | 9 | cyto | 538 | 61213.20 | 7.16 | 94.37 | -0.334 | 31.67 |

**Table. S2. Gene-specific primers for quantitative real-time PCR analysis.**

| Gene name | Forward primer(5’-3’) | Reverse primer(5’-3’) |
| --- | --- | --- |
| *LcUBI* | CTTCACCTTGTCCTTCGTCTG | TGGATCTTAGCCTTCACGTTG |
| *LcC2DP1* | TTTCACGCCAAGATCCCTAC | GAGTGTATTGCTGTTCCAAACG |
| *LcC2DP2* | TGTGGGGAGGGGTGAGATTC | TCTCCACTTGCACTTCTGGT |
| *LcC2DP8* | GGAGGGTCACGTCTTGTGG | CACTGAAGGTGGTGGAAGAGT |
| *LcC2DP24* | ATAGACCGGAACTTGGAAGGC | ATTGGCAGACGCCCATTTAG |
| *LcC2DP31* | GAGGGTGACAAGCGGAATGA | TGGCTGCTTCCATAGCTGTC |
| *LcC2DP36* | TTCTGTGCCGGATGATTGCT | GCGTCCTCAGCCTTACAGAA |
| *LcC2DP43* | CGGCACCGTGATCAAGAGAA | ACCGGGAAGATCAATCCAGTG |
| *LcC2DP60* | TATTTCTTGCTGCGGGGGTT | GCATGAAGGCAGTCCCATCT |
| *LcC2DP61* | AAGATGCGGTTGCAAGGTCT | CTGAAGCACCACTTCCCCAG |
| *LcC2DP62* | CGCAGCATGCAGTGTTGAAT | AAGCAGCAGCGTCAGATGAT |
| *LcC2DP5* | GCCTTCTGTAAAATGGGCGG | GGCTTCAAAGTAATGCGGGG |
| *LcC2DP11* | GGGCACAAGAGCACAAAAGT | TCGTCCTTGGTAAAGGTGTCC |
| *LcC2DP15* | GGCGCGGCAATAATTCCTTT | TTCCATCCACCATAGCTCGC |
| *LcC2DP38* | TAATTGCCGAGCAGGTTCCA | ACATTAGGATTTCCGGCCCA |
| *LcC2DP58* | TCAACCTGTCTCATGGCGTT | TGTAGGACATGGCTGGGATG |
| *bIZP* | AGATCCAGAGCGAGAAAGCAG | ATAAACCGCACCCCCTTTGG |
| *BHLH* | ACTGAGGTTGCAGGACTTGA | ATGGAACTGCTGTGGTCAGT |
| *WRKY* | GAACAGCACCGTATCAGCAC | TGAGCTATCCCTCCCAAAGC |
| *NAC* | GATTCCGTTTCCACCCGACT | TGGCAAATCCCAAGGGTCAG |
| *MYB_related* | CATGTTCCTGTTCCGGGGTA | GAAGTCCCATCAGGAAGCGT |
| *MYB* | TACCTTGAAGCGGAAGTGCG | TGACATCAGATCGGGAGGGA |
| *C2H2* | AGGAACCGAACCACAGCTAC | GGACGAGACAGAGTGAGCTT |
| *C3H* | CTGTGCCTAATGGGTCCACA | GCCGAGTTCCCATTCACCAT |

**Table. S3. *LcC2DP5* and *LcC2DP15* genes co-expressed transcription factor number statistics.**

| *LcC2DP5* genes co-expressed transcription factor number statistics. | | | | | |
| --- | --- | --- | --- | --- | --- |
| **TF name** | **TF number** | **TF name** | **TF number** | **TF name** | **TF number** |
| *bHLH* | 8 | *WRKY* | 7 | *C3H* | 7 |
| *bZIP* | 7 | *MYB* | 5 | *MYB_related* | 5 |
| *C2H2* | 5 | *NAC* | 5 | *B3* | 4 |
| *DBB* | 2 | *E2F/DP* | 4 | *NF-YA* | 4 |
| *RAV* | 2 | *SRS* | 2 | *WOX* | 4 |
| *CO-like* | 3 | *EIL* | 2 | *CPP* | 1 |
| *ZF-HD* | 1 | *LSD* | 1 | *HSF* | 1 |
| *GATA* | 3 | *EBS1* | 1 | *SBP* | 1 |
| *GRAS* | 1 | *AP2* | 1 | *TCP* | 2 |
| *NF-X1* | 1 | *ARF* | 1 | *Nin-like* | 1 |
| *ERF* | 4 | *Dof* | 4 | *S1Fa-like* | 3 |
| *MIKC_MADS* | 2 | *BBR-BPC* | 3 | *VOZ* | 2 |
| *G2-like* | 4 | *HD-ZIP* | 4 | *TALE* | 2 |
| *HB-other* | 2 | *Whirly* | 2 | *M-type_MADS* | 2 |
| *CAMTA* | 1 | *Trihelix* | 1 | *NF-YC* | 1 |
| *YN-FB* | 1 | *ARR-B* | 1 | *GeBP* | 1 |
| *FAR1* | 1 |  |  |  |  |
| *LcC2DP15* genes co-expressed transcription factor number statistics. | | | | | |
| **TF name** | **TF number** | **TF name** | **TF number** | **TF name** | **TF number** |
| *bHLH* | 15 | *WRKY* | 13 | *MYB_related* | 10 |
| *NAC* | 9 | *bZIP* | 9 | *C2H2* | 7 |
| *C3H* | 7 | *LBD* | 4 | *AP2* | 2 |
| *G2-like* | 4 | *CO-like* | 3 | *DBB* | 1 |
| *WOX* | 2 | *ARF* | 3 | *TCP* | 2 |
| *NF-YB* | 1 | *NF-YA* | 1 | *ERF* | 2 |
| *HSF* | 2 | *S1Fa-like* | 1 | *SBP* | 1 |
| *BES1* | 2 | *M-type_MADS* | 1 | *Dof* | 2 |
| *E2F/DP* | 1 | *NF-YC* | 1 | *GATA* | 2 |
| *Whirly* | 2 | *EIL* | 2 | *ZF-HD* | 1 |
| *B3* | 1 | *Trihelix* | 2 | *GeBP* | 2 |
| *GRAS* | 2 | *TALE* | 1 | *HB-other* | 1 |
| *MIKC_MADS* | 2 | *CPP* | 1 |  |  |
